# Supplementary material for: Decoding the historical tale: COVID-19 impact on haematological malignancy patients—EPICOVIDEHA insights from 2020 to 2022
Source: PubMed Central journal article supplement (PMC10963230; doi:10.1016/j.eclinm.2024.102553), 2024-03-18

Supplementary figure 5. Martingale residuals plot of the variables presented in the Cox regression analysis provided in Table 2.

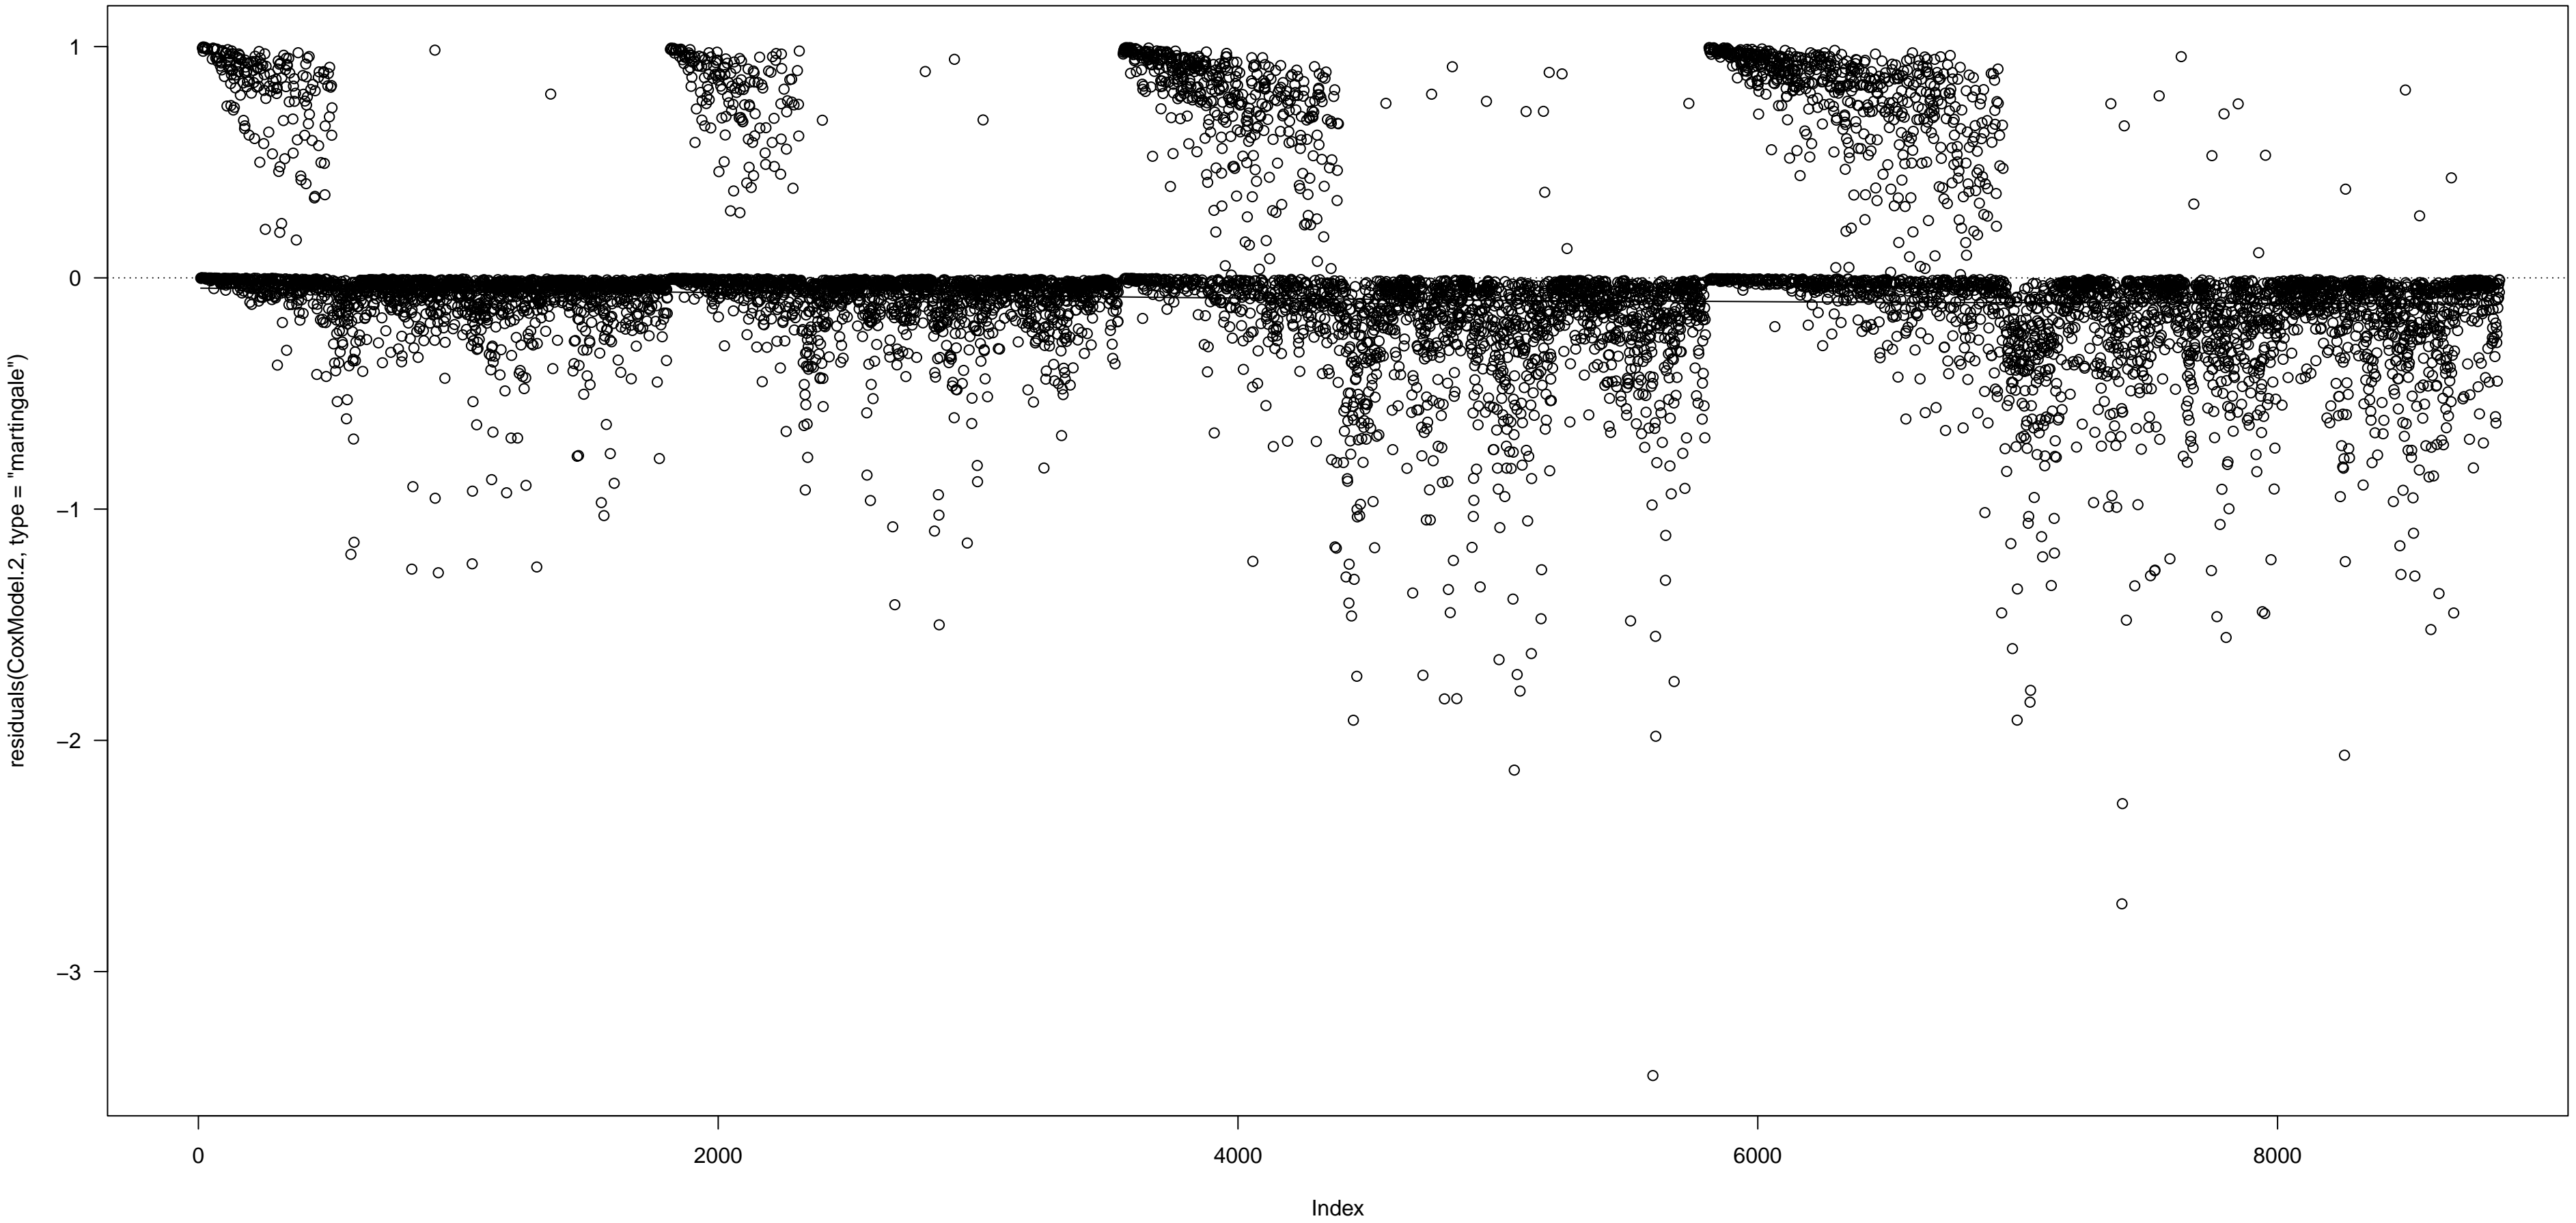

Supplement: mmc3.pdf [file mmc3.pdf]
