# Supplementary material for: Decoding the historical tale: COVID-19 impact on haematological malignancy patients—EPICOVIDEHA insights from 2020 to 2022
Source: PubMed Central journal article supplement (PMC10963230; doi:10.1016/j.eclinm.2024.102553), 2024-03-18
Supplement: mmc4.pdf [file mmc4.pdf]

**Supplementary figure 6.** Proportional hazard evaluation of the variables presented in the Cox regression analysis provided in Table 2.

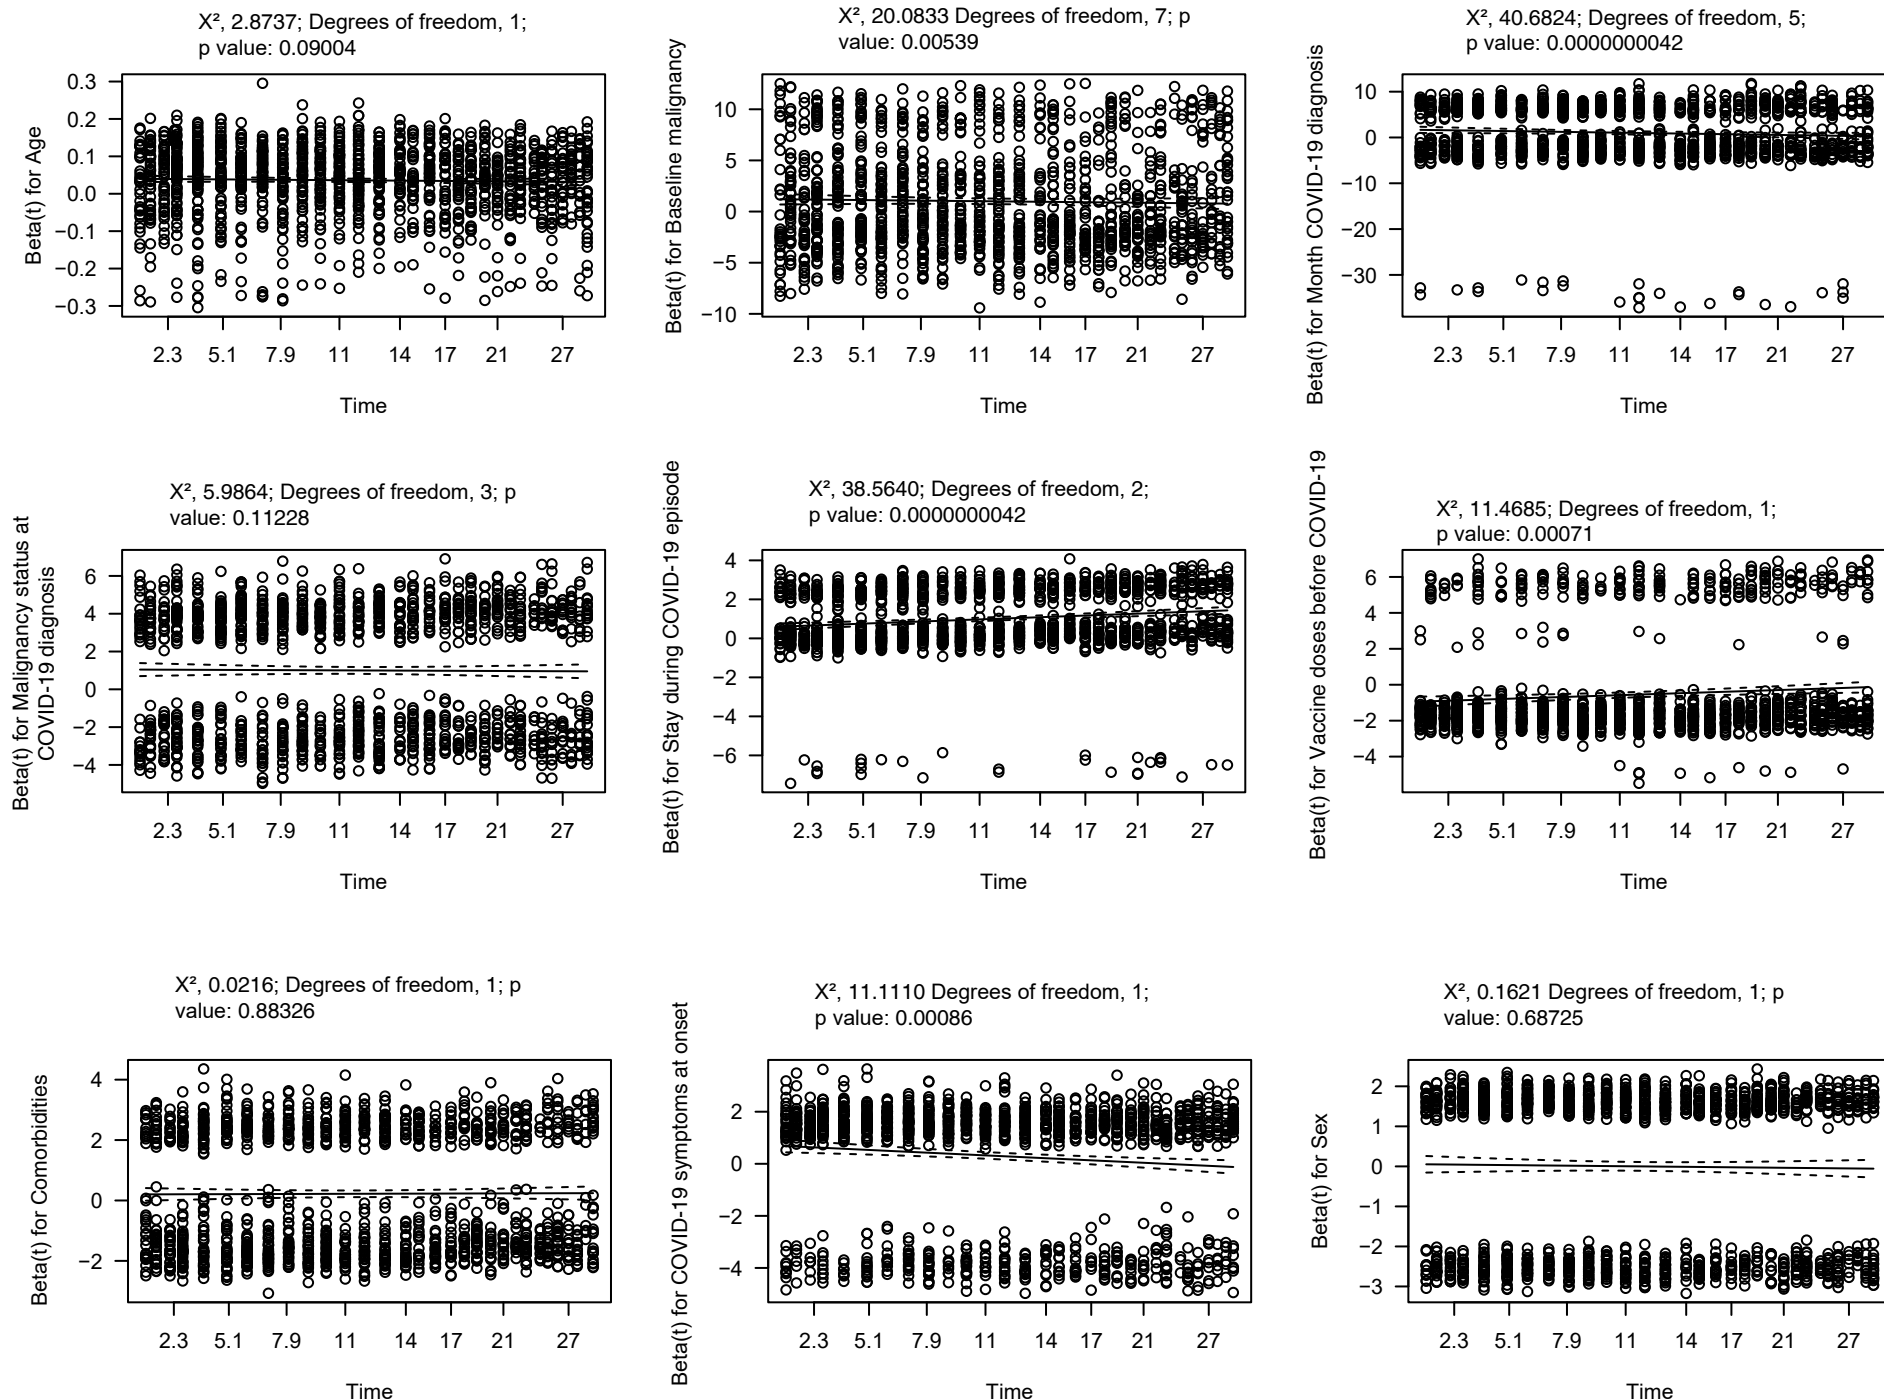

Q A C A ^ } • a a A a a } • a A a } , ^ A ] a } • A C e A ^ A } A [ ] ^ a A e A [ ] | , • A X a & a a a } A [ • A ^ f ! ^ A O U X O E J A [ A a & a a a } A a a A e A e o f A [ • A D a a O U X O E J A ^ { ] f { • A e A } • A o P [ A ^ { [ ] a a A a c [ c ^ { ^ } o a a A U ^ { [ ] a a A a c [ c ^ { ^ } D
