# Supplementary material for: Decoding the historical tale: COVID-19 impact on haematological malignancy patients—EPICOVIDEHA insights from 2020 to 2022
Source: PubMed Central journal article supplement (PMC10963230; doi:10.1016/j.eclinm.2024.102553), 2024-03-18

**Supplementary figure 7.** Martingale residuals plot of the variables presented in the Cox regression analysis provided in Table 2.

*In this sensitivity analysis answer options have been grouped as follows : Vaccination doses before COVID-19 (No vaccination and At least 1 dose); Month COVID-19 diagnosis (January-June 2020, July-December 2020, January-December 2021, and January-December 2022); and COVID-19 symptoms at onset (No pulmonary involvement and Pulmonary involvement)*

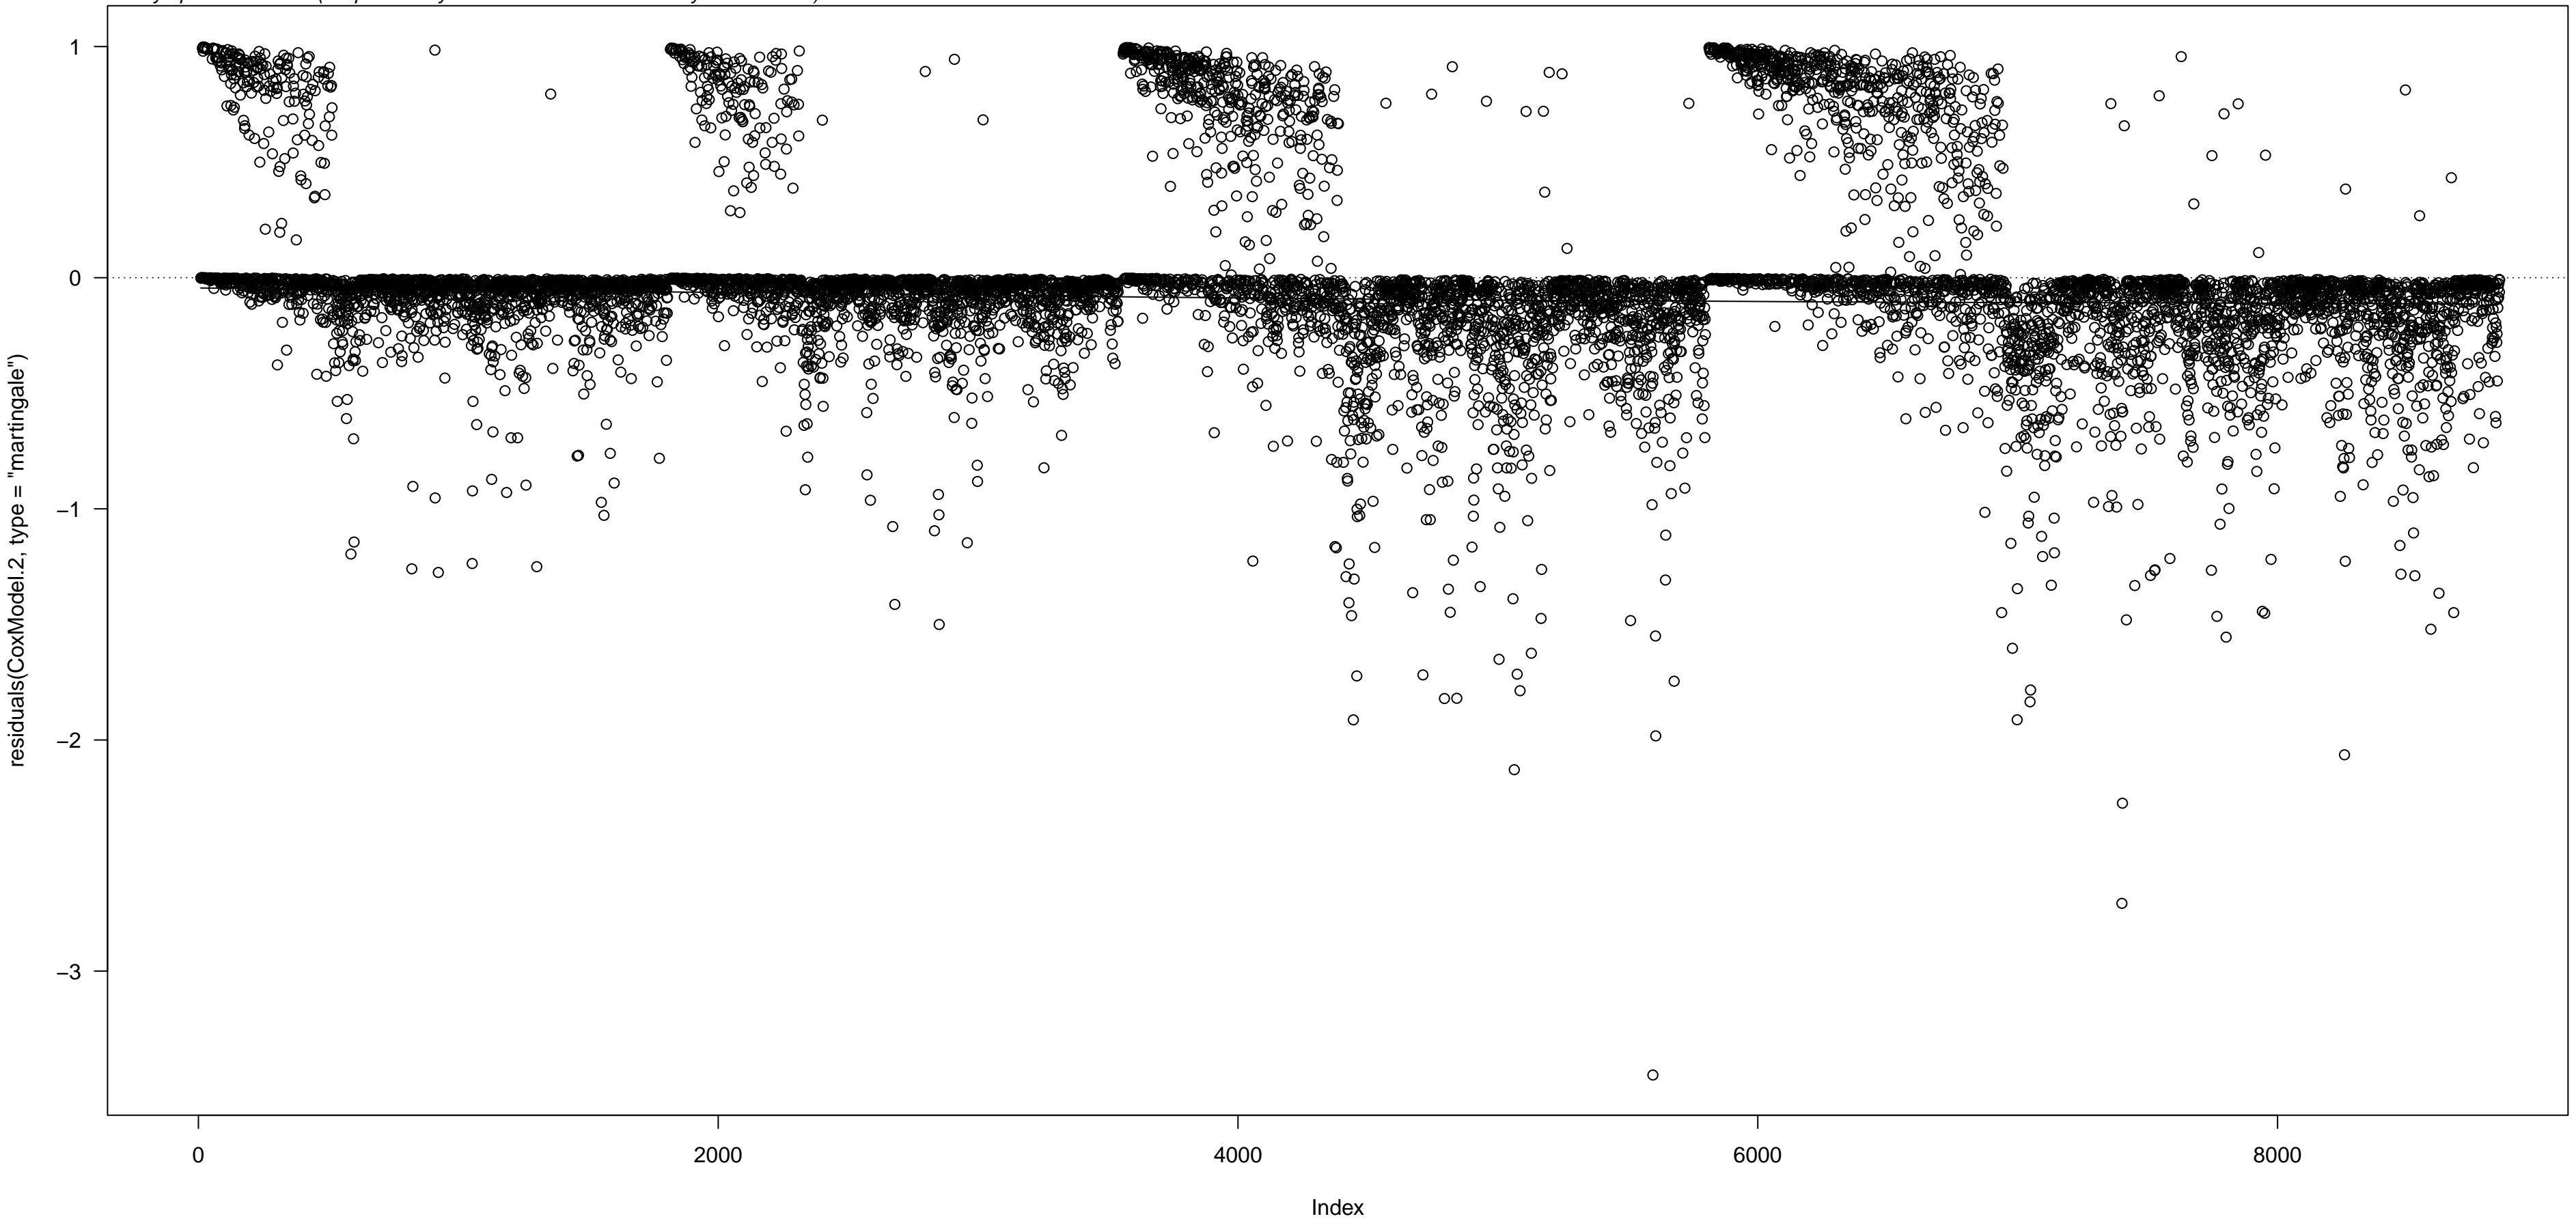

Supplement: mmc5.pdf [file mmc5.pdf]
