# Supplementary material for: Decoding the historical tale: COVID-19 impact on haematological malignancy patients—EPICOVIDEHA insights from 2020 to 2022
Source: PubMed Central journal article supplement (PMC10963230; doi:10.1016/j.eclinm.2024.102553), 2024-03-18
Supplement: mmc6.pdf [file mmc6.pdf]

**Supplementary figure 8. 2020 – 2022 survival probability per semester (Y axis 70% to 100%)**

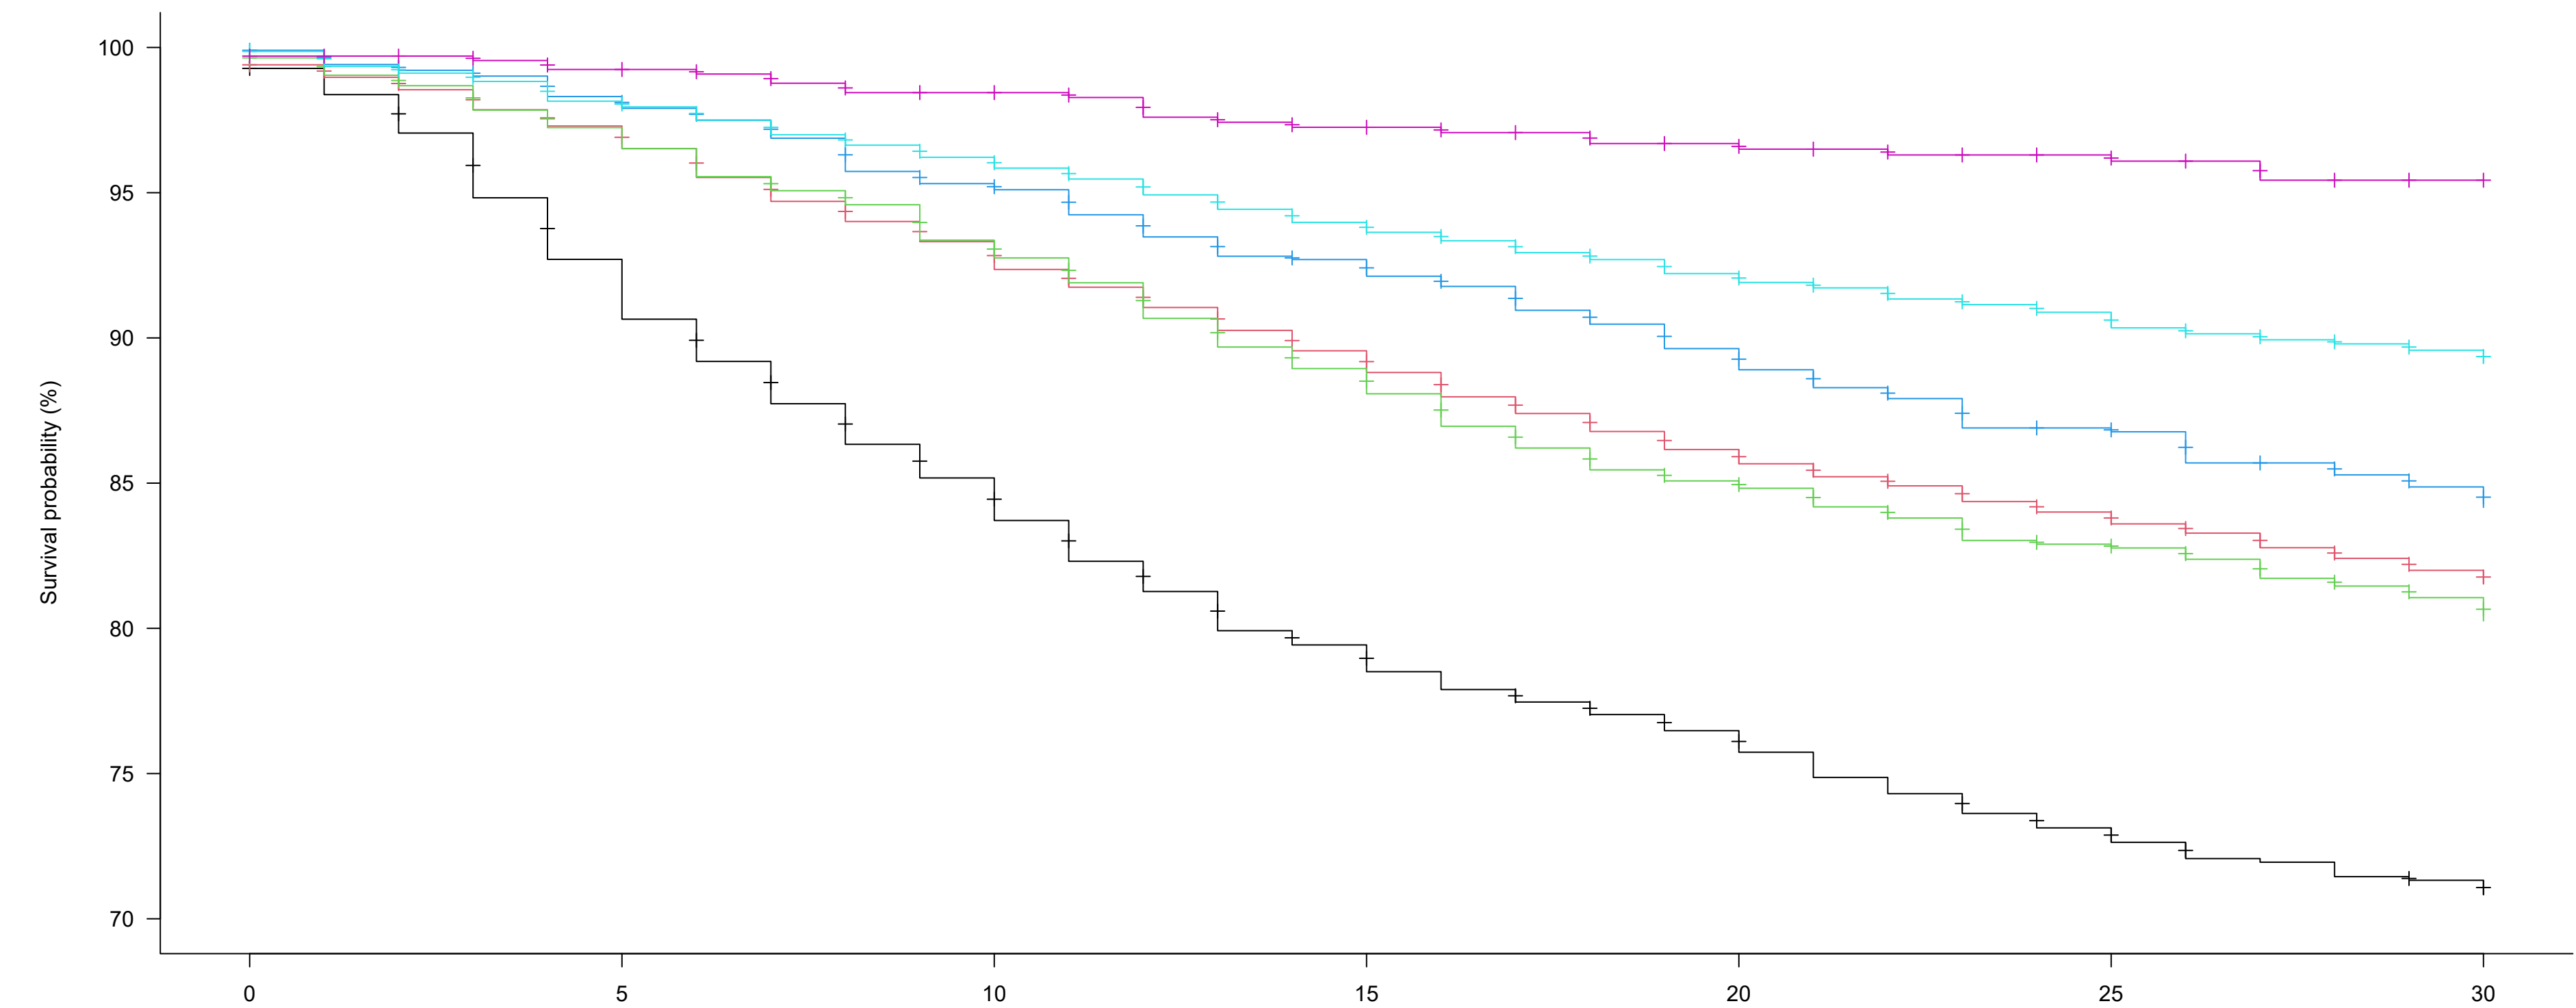

| Number at risk       |      | 0    | 5    | 10   | 15   | 20   | 25   | 30 |
|----------------------|------|------|------|------|------|------|------|----|
| January - June 2020  | 1665 | 1530 | 1396 | 1294 | 1235 | 1176 | 1144 |    |
| July - December 2020 | 2342 | 2253 | 2145 | 2037 | 1935 | 1852 | 1781 |    |
| January - June 2021  | 837  | 806  | 764  | 717  | 669  | 640  | 607  |    |
| July - December 2021 | 1026 | 969  | 902  | 807  | 737  | 660  | 603  |    |
| January - June 2022  | 2174 | 1989 | 1813 | 1643 | 1508 | 1355 | 1224 |    |
| July - December 2022 | 675  | 639  | 594  | 542  | 502  | 453  | 409  |    |
