# Supplementary material for: Decoding the historical tale: COVID-19 impact on haematological malignancy patients—EPICOVIDEHA insights from 2020 to 2022
Source: PubMed Central journal article supplement (PMC10963230; doi:10.1016/j.eclinm.2024.102553), 2024-03-18
Supplement: mmc7.pdf [file mmc7.pdf]

**Supplementary figure 9.** 2020 – 2022 survival probability per vaccine doses before COVID-19 (Y axis 70% to 100%)

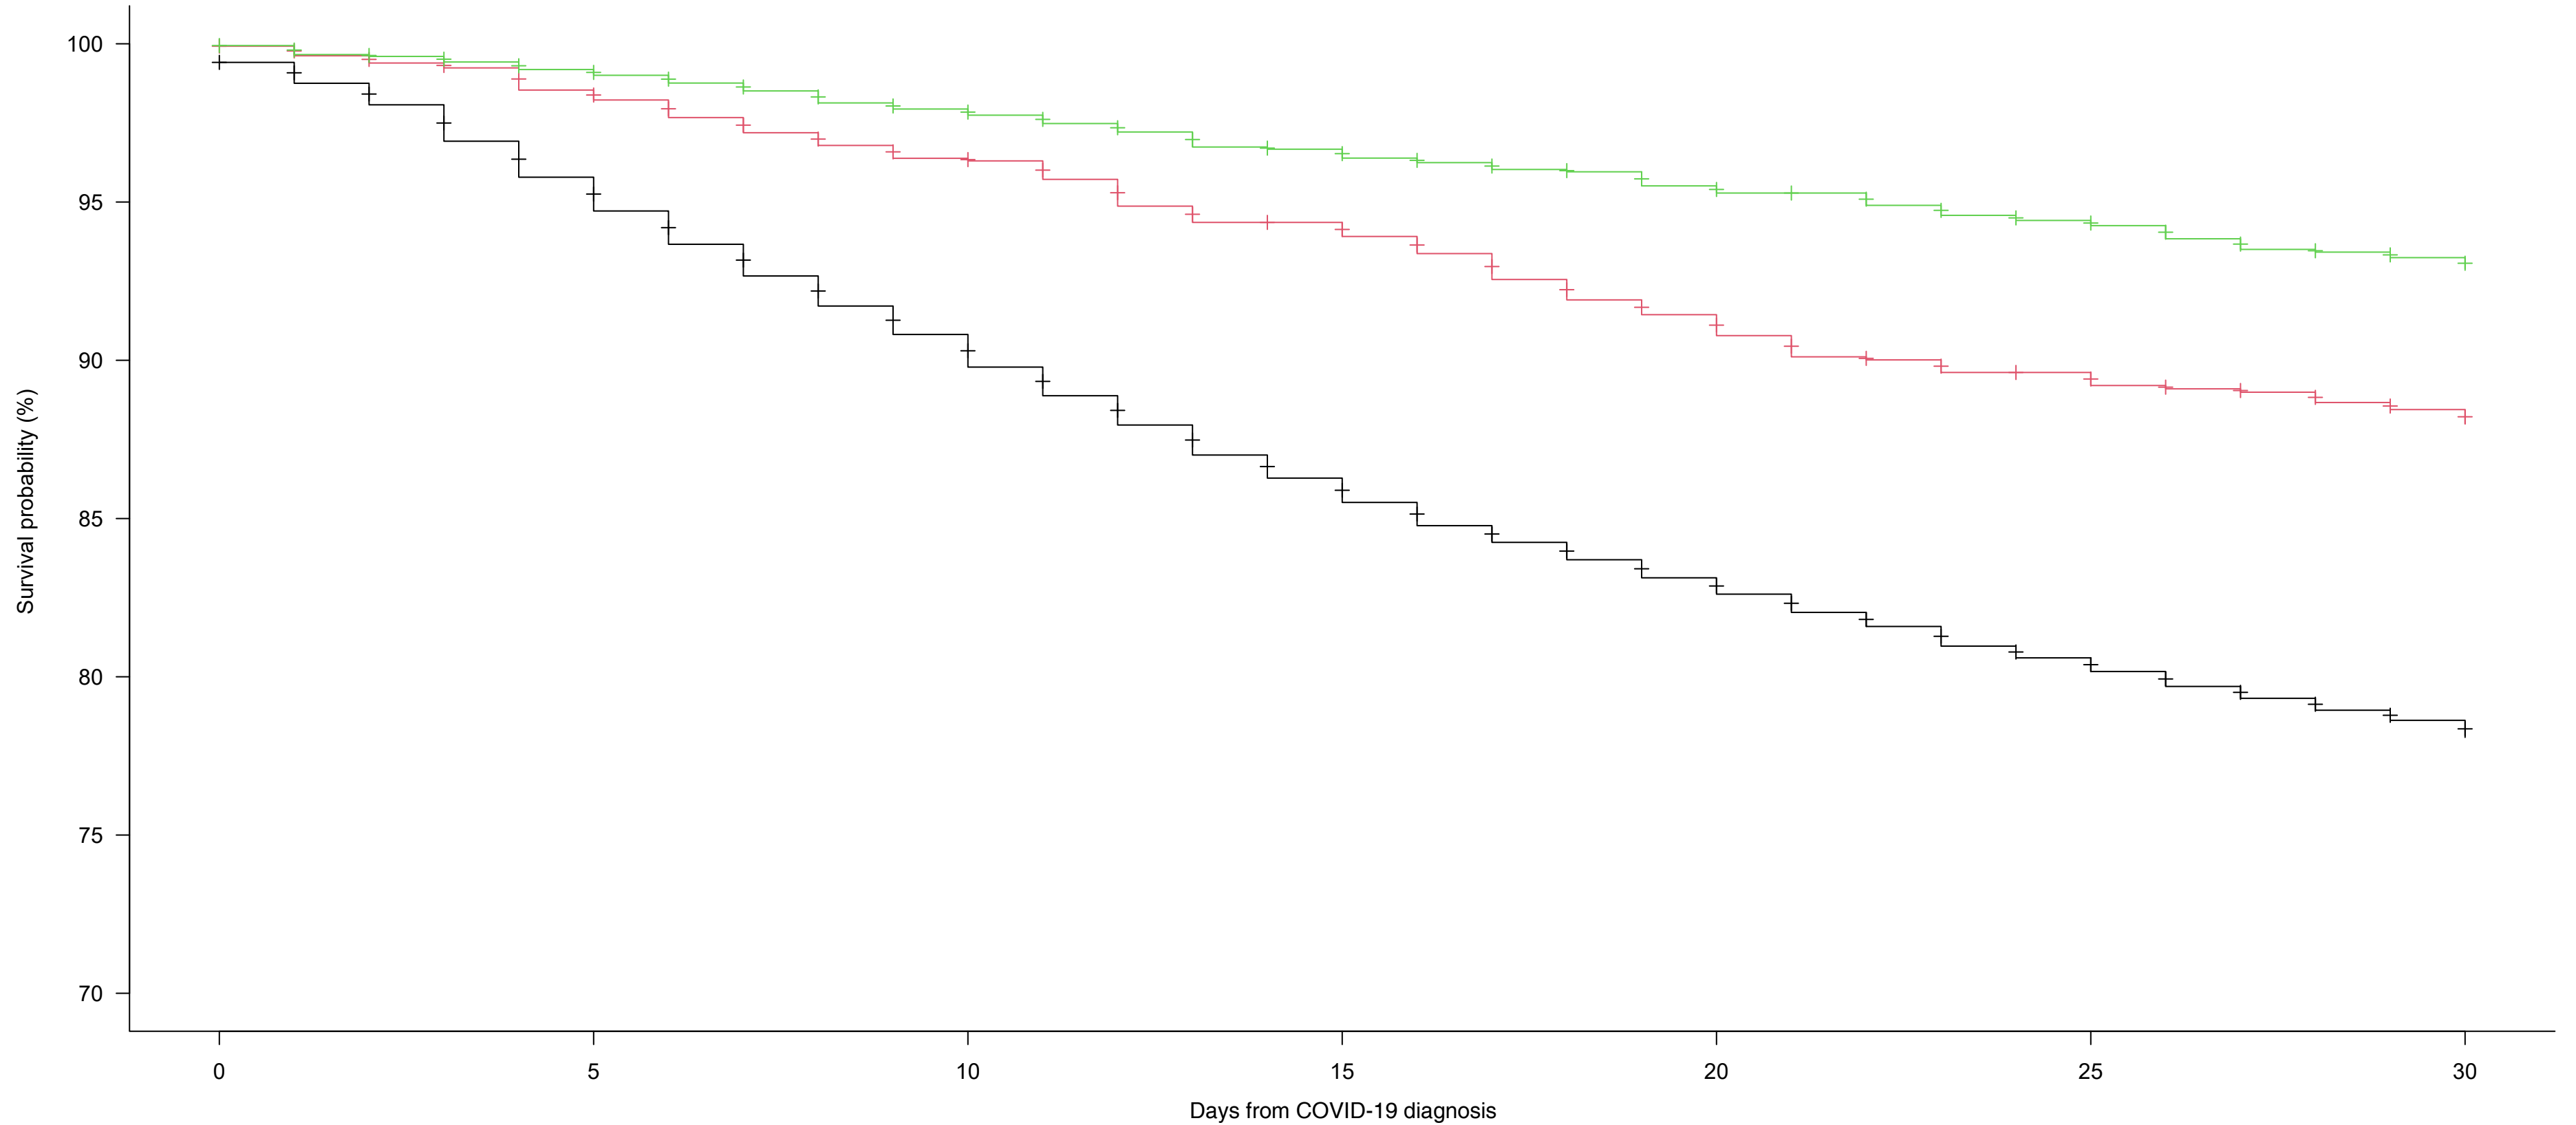

| Number at risk |      |      |      |      |      |      |      |
|----------------|------|------|------|------|------|------|------|
|                | 0    | 5    | 10   | 15   | 20   | 25   | 30   |
| Not vaccinated | 5621 | 5293 | 4935 | 4602 | 4349 | 4114 | 3936 |
| 1 - 2 vaccines | 1326 | 1255 | 1173 | 1062 | 968  | 870  | 776  |
| 3+ vaccines    | 1772 | 1638 | 1506 | 1376 | 1269 | 1152 | 1056 |
