# Supplementary material for: Decoding the historical tale: COVID-19 impact on haematological malignancy patients—EPICOVIDEHA insights from 2020 to 2022
Source: PubMed Central journal article supplement (PMC10963230; doi:10.1016/j.eclinm.2024.102553), 2024-03-18
Supplement: mmc8.pdf [file mmc8.pdf]

**Supplementary figure 10.** 2020 – 2022 survival probability per vaccine doses before COVID-19 and COVID-19 treatment, 0 vaccines (Y axis 70% to 100%)

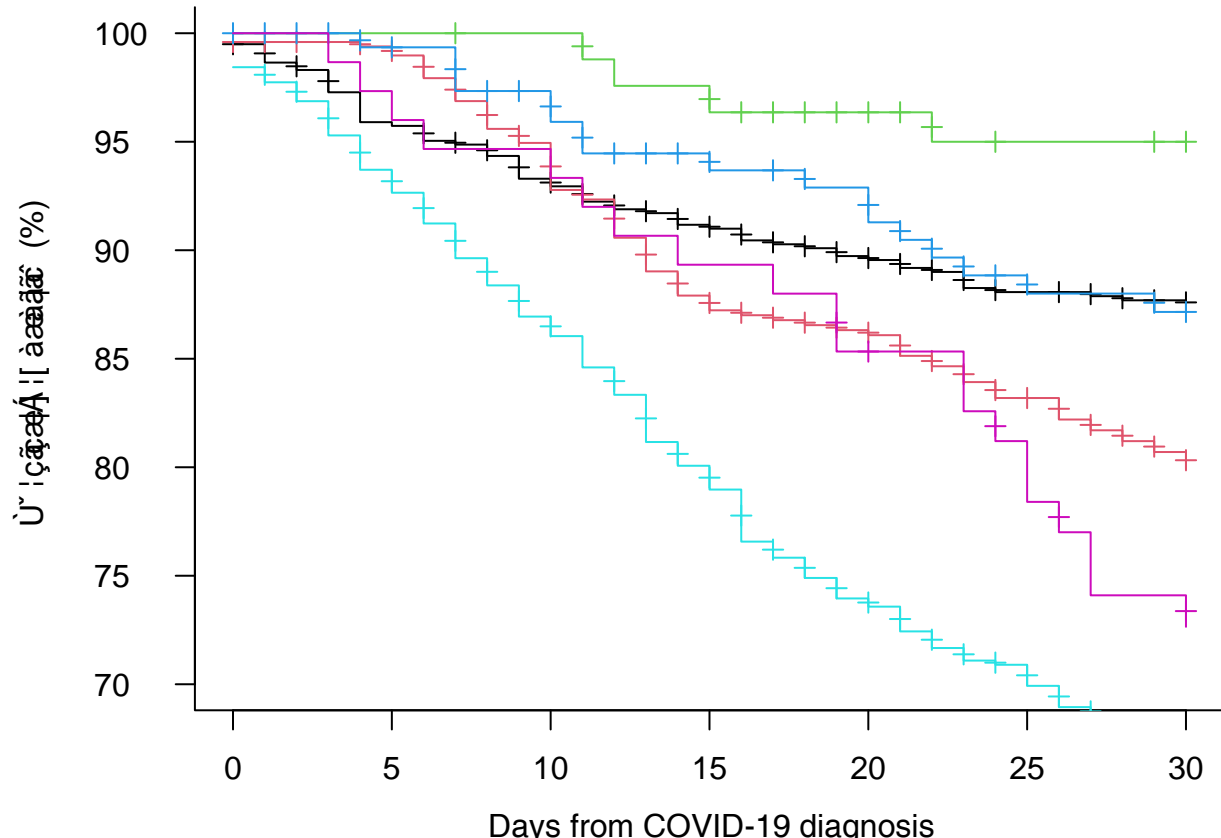

Number at risk

|                                        |     |     |     |     |     |     |     |
|----------------------------------------|-----|-----|-----|-----|-----|-----|-----|
| No treatment                           | 594 | 557 | 532 | 508 | 494 | 472 | 456 |
| AVs ± plasma ± corticosteroids         | 495 | 479 | 438 | 389 | 371 | 338 | 320 |
| AVs ± MoABs ± plasma ± corticosteroids | 84  | 84  | 83  | 80  | 74  | 67  | 66  |
| MoABs ± plasma ± corticosteroids       | 164 | 152 | 137 | 121 | 116 | 106 | 101 |
| Corticosteroids                        | 575 | 531 | 483 | 438 | 391 | 365 | 336 |
| Plasma                                 | 75  | 73  | 71  | 67  | 63  | 58  | 51  |
