# Supplementary material for: Decoding the historical tale: COVID-19 impact on haematological malignancy patients—EPICOVIDEHA insights from 2020 to 2022
Source: PubMed Central journal article supplement (PMC10963230; doi:10.1016/j.eclinm.2024.102553), 2024-03-18
Supplement: mmc9.pdf [file mmc9.pdf]

**Supplementary figure 11.** 2020 – 2022 survival probability per vaccine doses before COVID-19 and COVID-19 treatment, 1-2 vaccines (Y axis 70% to 100%)

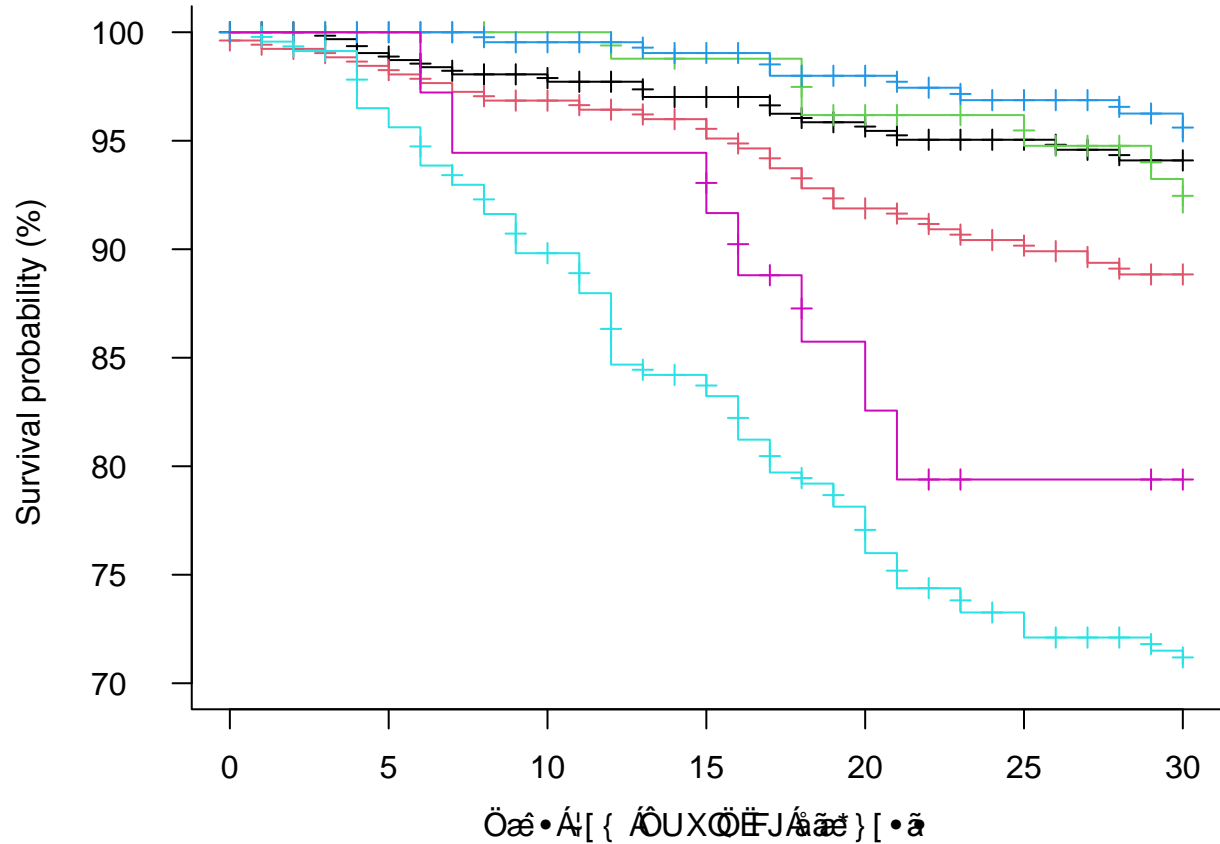

|                                        | 0   | 5   | 10  | 15  | 20  | 25  | 30  |
|----------------------------------------|-----|-----|-----|-----|-----|-----|-----|
| No treatment                           | 327 | 308 | 289 | 259 | 240 | 214 | 176 |
| AVs ± plasma ± corticosteroids         | 262 | 249 | 236 | 215 | 195 | 175 | 161 |
| AVs ± MoABs ± plasma ± corticosteroids | 88  | 86  | 82  | 76  | 71  | 68  | 60  |
| MoABs ± plasma ± corticosteroids       | 238 | 222 | 208 | 192 | 181 | 162 | 149 |
| Corticosteroids                        | 231 | 219 | 196 | 172 | 146 | 127 | 115 |
| Plasma                                 | 36  | 36  | 34  | 34  | 27  | 23  | 22  |
