# Supplementary material for: Decoding the historical tale: COVID-19 impact on haematological malignancy patients—EPICOVIDEHA insights from 2020 to 2022
Source: PubMed Central journal article supplement (PMC10963230; doi:10.1016/j.eclinm.2024.102553), 2024-03-18
Supplement: mmc10.pdf [file mmc10.pdf]

**Supplementary figure 12.** 2020 – 2022 survival probability per vaccine doses before COVID-19 and COVID-19 treatment, 3+ vaccines (Y axis 70% to 100%)

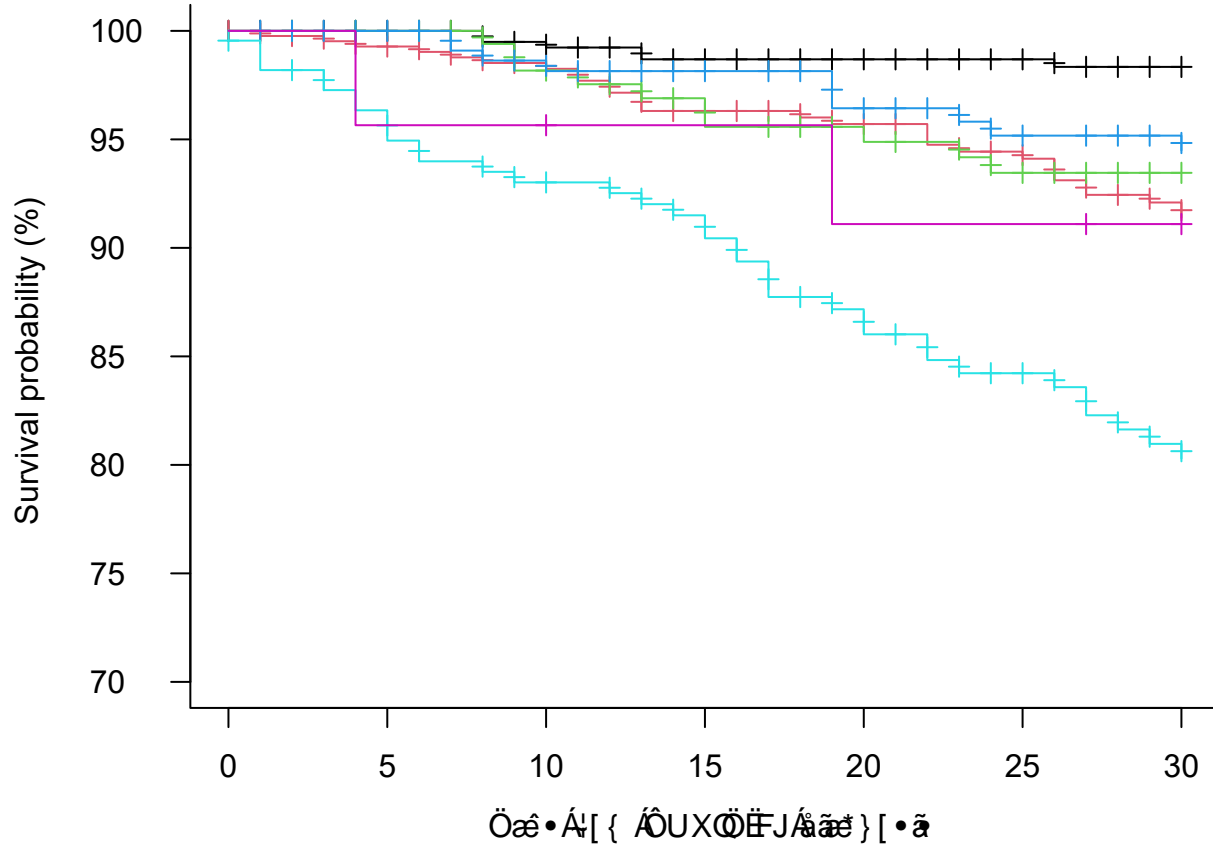

Number at risk

|                                        | 0   | 5   | 10  | 15  | 20  | 25  | 30  |
|----------------------------------------|-----|-----|-----|-----|-----|-----|-----|
| No treatment                           | 466 | 418 | 383 | 349 | 320 | 287 | 262 |
| AVs ± plasma ± corticosteroids         | 428 | 403 | 368 | 331 | 312 | 290 | 260 |
| AVs ± MoABs ± plasma ± corticosteroids | 176 | 171 | 158 | 147 | 138 | 127 | 118 |
| MoABs ± plasma ± corticosteroids       | 255 | 227 | 203 | 184 | 167 | 145 | 140 |
| Corticosteroids                        | 222 | 207 | 190 | 173 | 151 | 133 | 120 |
| Plasma                                 | 23  | 22  | 22  | 21  | 20  | 20  | 19  |
